# Supplementary material for: C3N6H7SO3NH2: non-π-conjugated tetrahedra decoupling π-conjugated groups achieving large optical anisotropy and wide band gap
Source: Royal Society of Chemistry journal article supplement (doi:10.1039/d3qm00811h), 2023-01-01
Supplement: d3qm00811h1.pdf [file d3qm00811h1.pdf]

# **C<sub>3</sub>N<sub>6</sub>H<sub>7</sub>SO<sub>3</sub>NH<sub>2</sub> : Non- $\pi$ -Conjugated Tetrahedra Decoupling $\pi$ -Conjugated Groups Achieving Large Optical Anisotropy and Wide Band Gap**

Danyang Dou,<sup>a</sup> Qi Shi,<sup>a</sup> Yunjie Bai,<sup>a</sup> Cheng Chen,<sup>a</sup> Bingbing Zhang,<sup>a</sup> and Ying Wang<sup>\*a</sup>

<sup>a</sup> Key Laboratory of Analytical Science and Technology of Hebei Province, College of Chemistry and Materials Science, Hebei University, Baoding 071002, China. Email: wangy@hbu.edu.cn.

## **Table of Contents**

|                                                                                                                                                                                       |     |
|---------------------------------------------------------------------------------------------------------------------------------------------------------------------------------------|-----|
| <b>Table S1.</b> Atomic coordinates and equivalent isotropic displacement parameters for C <sub>3</sub> N <sub>6</sub> H <sub>7</sub> SO <sub>3</sub> NH <sub>2</sub> .....           | S2  |
| <b>Table S2.</b> Bond lengths [Å] and angles [°] for C <sub>3</sub> N <sub>6</sub> H <sub>7</sub> SO <sub>3</sub> NH <sub>2</sub> .....                                               | S3  |
| <b>Table S3.</b> Hydrogen bonds for C <sub>3</sub> N <sub>6</sub> H <sub>7</sub> SO <sub>3</sub> NH <sub>2</sub> .....                                                                | S4  |
| <b>Table S4.</b> Optical properties of compounds containing [C <sub>3</sub> N <sub>6</sub> H <sub>7</sub> ] groups.....                                                               | S5  |
| <b>Table S5.</b> The shortest distance of [C <sub>3</sub> N <sub>6</sub> H <sub>7</sub> ] units and band gaps of crystals.....                                                        | S6  |
| <b>Figure S1.</b> SEM images and EDX microanalysis for C <sub>3</sub> N <sub>6</sub> H <sub>7</sub> SO <sub>3</sub> NH <sub>2</sub> .....                                             | S7  |
| <b>Figure S2.</b> The IR spectrum for C <sub>3</sub> N <sub>6</sub> H <sub>7</sub> SO <sub>3</sub> NH <sub>2</sub> .....                                                              | S8  |
| <b>Figure S3.</b> The UV-vis-NIR diffuse reflectance spectrum of C <sub>3</sub> N <sub>6</sub> H <sub>6</sub> .....                                                                   | S9  |
| <b>Figure S4.</b> Crystal picture under polarizing microscope. (a) The original colour of crystal; (b) Crystal achieving complete extinction; (c) The thickness of crystal.....       | S10 |
| <b>Figure S5.</b> The calculated band gaps using GGA (a and b) and HSE06 functionals (c and d) for C <sub>3</sub> N <sub>6</sub> H <sub>7</sub> SO <sub>3</sub> NH <sub>2</sub> ..... | S11 |
| <b>Reference.</b> .....                                                                                                                                                               | S12 |

**Table S1.** Atomic coordinates and equivalent isotropic displacement parameters for  $C_3N_6H_7SO_3NH_2$ .

| Atom | <i>x</i>    | <i>y</i>   | <i>z</i>     | U(eq)     |
|------|-------------|------------|--------------|-----------|
| C1   | 0.5140(5)   | 0.7750(3)  | 0.5894(2)    | 0.0254(6) |
| C2   | 0.2975(5)   | 0.6264(3)  | 0.4034(2)    | 0.0262(6) |
| C3   | 0.6809(5)   | 0.8157(3)  | 0.4032(2)    | 0.0262(6) |
| S1   | 0.14325(14) | 0.75661(9) | 0.01911(6)   | 0.0284(2) |
| O1   | 0.2650(4)   | 0.9252(2)  | 0.07626(18)  | 0.0408(5) |
| O2   | 0.1390(4)   | 0.7274(3)  | -0.11927(17) | 0.0418(6) |
| O3   | 0.2553(4)   | 0.6185(2)  | 0.08195(17)  | 0.0338(5) |
| N1   | 0.5305(5)   | 0.8116(3)  | 0.7158(2)    | 0.0369(6) |
| H1A  | 0.415132    | 0.763521   | 0.757067     | 0.044     |
| H1B  | 0.656614    | 0.883575   | 0.756924     | 0.044     |
| N2   | 0.3108(4)   | 0.6608(3)  | 0.53115(19)  | 0.0284(6) |
| N3   | 0.7033(4)   | 0.8534(3)  | 0.53052(19)  | 0.0283(6) |
| N4   | 0.1077(4)   | 0.5165(3)  | 0.3377(2)    | 0.0344(6) |
| H4A  | -0.008892   | 0.466354   | 0.377234     | 0.041     |
| H4B  | 0.100156    | 0.494800   | 0.255238     | 0.041     |
| N5   | 0.4782(4)   | 0.7040(3)  | 0.3378(2)    | 0.0297(6) |
| H5   | 0.461(6)    | 0.686(4)   | 0.257(3)     | 0.035     |
| N6   | 0.8518(5)   | 0.8871(3)  | 0.3359(2)    | 0.0355(6) |
| H6A  | 0.980320    | 0.959303   | 0.374445     | 0.043     |
| H6B  | 0.834995    | 0.861481   | 0.253404     | 0.043     |
| N7   | -0.1605(5)  | 0.7513(3)  | 0.0550(2)    | 0.0314(6) |
| H7A  | -0.238(5)   | 0.649(3)   | 0.022(3)     | 0.038     |
| H7B  | -0.237(5)   | 0.835(3)   | 0.021(3)     | 0.038     |

$U_{eq}$  is defined as 1/3 of the trace of the orthogonalized  $U_{ij}$  tensor.

**Table S2.** Bond lengths [ $\text{\AA}$ ] and angles [ $^\circ$ ] for  $\text{C}_3\text{N}_6\text{H}_7\text{SO}_3\text{NH}_2$ .

| Atom–Atom | Length [ $\text{\AA}$ ] | Atom–Atom–Atom | Angle [ $^\circ$ ] |
|-----------|-------------------------|----------------|--------------------|
| C1–N1     | 1.317(3)                | N1–C1–N2       | 116.8(2)           |
| C1–N2     | 1.352(3)                | N1–C1–N3       | 117.1(2)           |
| C1–N3     | 1.352(3)                | N2–C1–N3       | 126.1(2)           |
| C2–N4     | 1.314(3)                | N4–C2–N2       | 120.4(2)           |
| C2–N2     | 1.332(3)                | N4–C2–N5       | 118.5(2)           |
| C2–N5     | 1.361(3)                | N2–C2–N5       | 121.1(2)           |
| C3–N6     | 1.317(3)                | N6–C3–N3       | 121.0(2)           |
| C3–N3     | 1.326(3)                | N6–C3–N5       | 117.9(2)           |
| C3–N5     | 1.363(3)                | N3–C3–N5       | 121.1(2)           |
| S1–O2     | 1.4438(19)              | O2–S1–O1       | 113.55(12)         |
| S1–O1     | 1.444(2)                | O2–S1–O3       | 111.63(13)         |
| S1–O3     | 1.461(2)                | O1–S1–O3       | 112.26(12)         |
| S1–N7     | 1.648(3)                | O2–S1–N7       | 109.62(12)         |
| N1–H1A    | 0.8600                  | O1–S1–N7       | 104.29(13)         |
| N1–H1B    | 0.8600                  | O3–S1–N7       | 104.81(12)         |
| N4–H4A    | 0.8600                  | C1–N1–H1A      | 120.0              |
| N4–H4B    | 0.8600                  | C1–N1–H1B      | 120.0              |
| N5–H5     | 0.84(3)                 | H1A–N1–H1B     | 120.0              |
| N6–H6A    | 0.8600                  | C2–N2–C1       | 115.7(2)           |
| N6–H6B    | 0.8600                  | C3–N3–C1       | 115.9(2)           |
| N7–H7A    | 0.878(17)               | C2–N4–H4A      | 120.0              |
| N7–H7B    | 0.883(17)               | C2–N4–H4B      | 120.0              |
|           |                         | H4A–N4–H4B     | 120.0              |
|           |                         | C2–N5–C3       | 120.0(2)           |
|           |                         | C2–N5–H5       | 120(2)             |
|           |                         | C3–N5–H5       | 120(2)             |
|           |                         | C3–N6–H6A      | 120.0              |
|           |                         | C3–N6–H6B      | 120.0              |
|           |                         | H6A–N6–H6B     | 120.0              |
|           |                         | S1–N7–H7A      | 106(2)             |
|           |                         | S1–N7–H7B      | 108.6(19)          |
|           |                         | H7A–N7–H7B     | 112(3)             |

**Table S3.** Hydrogen bonds for C<sub>3</sub>N<sub>6</sub>H<sub>7</sub>SO<sub>3</sub>NH<sub>2</sub>.

| D-H                       | d(D-H)    | d(H..A) | ∠DHA     | d(D..A) |
|---------------------------|-----------|---------|----------|---------|
| N1-H1A...O2 <sup>#1</sup> | 0.86      | 2.06    | 2.887(3) | 162.0   |
| N1-H1B...O1 <sup>#2</sup> | 0.86      | 2.15    | 2.863(3) | 140.2   |
| N4-H4A...N2 <sup>#3</sup> | 0.86      | 2.15    | 3.009(3) | 177.7   |
| N4-H4B...O2 <sup>#4</sup> | 0.86      | 2.29    | 2.903(3) | 128.7   |
| N4-H4B...O3               | 0.86      | 2.34    | 3.049(3) | 139.4   |
| N6-H6A...N3 <sup>#5</sup> | 0.86      | 2.16    | 3.019(3) | 178.3   |
| N6-H6B...N7 <sup>#6</sup> | 0.86      | 2.17    | 3.014(3) | 167.7   |
| N5-H5...S1                | 0.84(3)   | 2.96(3) | 3.669(3) | 144(2)  |
| N5-H5...O3                | 0.84(3)   | 2.00(3) | 2.780(3) | 154(3)  |
| N7-H7A...O3 <sup>#4</sup> | 0.878(17) | 2.24(2) | 3.061(3) | 155(3)  |
| N7-H7B...O1 <sup>#7</sup> | 0.883(17) | 2.25(2) | 3.086(3) | 157(3)  |

Symmetry transformations used to generate equivalent atoms:

#1: +X, +Y, 1+Z; #2: 1-X, 2-Y, 1-Z; #3: -X, 1-Y, 1-Z; #4: -X, 1-Y, -Z; #5: 2-X, 2-Y, 1-Z; #6: 1+X, +Y, +Z; #7: -X, 2-Y, -Z;

**Table S4.** Optical properties of compounds containing [C<sub>3</sub>N<sub>6</sub>H<sub>7</sub>] groups.

| No. | Crystals                                                                                                                                          | Band gap                | Birefringence @546 nm         | UV Cut-off (nm) | reference        |
|-----|---------------------------------------------------------------------------------------------------------------------------------------------------|-------------------------|-------------------------------|-----------------|------------------|
| 1   | (C <sub>3</sub> N <sub>6</sub> H <sub>7</sub> ) <sub>3</sub> HgCl <sub>5</sub>                                                                    | 4.19 <sup>e</sup>       | 0.093@1064n<br>m <sup>c</sup> | 290             | 1                |
| 2   | (C <sub>3</sub> N <sub>6</sub> H <sub>7</sub> ) <sub>2</sub> SiF <sub>6</sub> ·H <sub>2</sub> O                                                   | 4.76 <sup>e</sup>       | 0.152 <sup>c</sup>            | 220             | 2                |
| 3   | (C <sub>3</sub> N <sub>6</sub> H <sub>6</sub> ) <sub>2</sub> (C <sub>3</sub> N <sub>6</sub> H <sub>7</sub> )PF <sub>6</sub> ·H <sub>2</sub> O     | 4.20 <sup>e</sup>       | 0.243 <sup>c</sup>            | 300             | 3                |
| 4   | (C <sub>3</sub> N <sub>6</sub> H <sub>7</sub> )(C <sub>3</sub> N <sub>6</sub> H <sub>6</sub> )HgCl <sub>3</sub>                                   | 4.40 <sup>e</sup>       | 0.246@1064n<br>m <sup>c</sup> | 278             | 1                |
| 5   | (H <sub>7</sub> C <sub>3</sub> N <sub>6</sub> )·(H <sub>6</sub> C <sub>3</sub> N <sub>6</sub> )ZnCl <sub>3</sub>                                  | 3.95 <sup>e</sup>       | 0.255@1064n<br>m <sup>c</sup> | 245             | 4                |
| 6   | C <sub>3</sub> H <sub>6</sub> N <sub>6</sub>                                                                                                      | 4.60 <sup>e</sup>       | 0.26 <sup>c</sup>             | 248             |                  |
| 7   | (C <sub>3</sub> N <sub>6</sub> H <sub>6</sub> ) <sub>4</sub> HPF <sub>6</sub>                                                                     | 4.12 <sup>e</sup>       | 0.264 <sup>c</sup>            | 300             | 3                |
| 8   | 2(C <sub>3</sub> H <sub>7</sub> N <sub>6</sub> ) <sup>+</sup> ·2Cl <sup>-</sup> ·H <sub>2</sub> O                                                 | 4.75 <sup>e</sup>       | 0.277 <sup>c</sup>            | 245             | 5                |
| 9   | (C <sub>3</sub> H <sub>8</sub> N <sub>6</sub> )PbBr <sub>4</sub>                                                                                  | 3.13 <sup>e</sup>       | 0.322 <sup>e</sup>            | 374             | 6                |
| 10  | (C <sub>3</sub> H <sub>7</sub> N <sub>8</sub> )SnCl <sub>4</sub>                                                                                  | 3.71 <sup>e</sup>       | 0.294 <sup>e</sup>            | 334             | 7                |
| 11  | (C <sub>3</sub> H <sub>7</sub> N <sub>6</sub> ) <sub>2</sub> Cl <sub>2</sub> ·H <sub>2</sub> O                                                    | 4.70 <sup>e</sup>       | 0.33 <sup>c</sup>             | 230             | 8                |
| 12  | <b>C<sub>3</sub>N<sub>6</sub>H<sub>7</sub>SO<sub>3</sub>NH<sub>2</sub></b>                                                                        | <b>5.53<sup>e</sup></b> | <b>0.34<sup>c</sup></b>       | <b>206</b>      | <b>This work</b> |
| 13  | (C <sub>3</sub> N <sub>6</sub> H <sub>7</sub> ) <sub>2</sub> SbF <sub>5</sub> ·H <sub>2</sub> O                                                   | 4.74 <sup>e</sup>       | 0.38 <sup>c</sup>             | 220             | 9                |
| 14  | (C <sub>3</sub> H <sub>7</sub> N <sub>6</sub> )F·H <sub>2</sub> O                                                                                 | 4.72 <sup>e</sup>       | 0.38 <sup>c</sup>             | 220             | 8                |
| 15  | [C <sub>3</sub> N <sub>6</sub> H <sub>7</sub> ] <sub>2</sub> [B <sub>3</sub> O <sub>3</sub> F <sub>4</sub> (OH)]                                  | 4.72 <sup>e</sup>       | 0.44 <sup>c</sup>             | 240             | 10               |
| 16  | (C <sub>3</sub> N <sub>6</sub> H <sub>7</sub> ) <sub>6</sub> (H <sub>2</sub> PO <sub>4</sub> ) <sub>4</sub> (HPO <sub>4</sub> )·4H <sub>2</sub> O | 4.60 <sup>e</sup>       | 0.22 <sup>c</sup>             | /               | 11               |

Note: the upper corner labeled "e" stands for experimentally obtained and the upper corner labeled "c" indicates theoretically calculated.

**Table S5.** The shortest distance of [C<sub>3</sub>N<sub>6</sub>H<sub>7</sub>] units and band gaps of crystals.

| <b>Crystals</b>                                                                                                                               | <b>Band gap (eV)</b>    | <b>Distance [Å]</b> |
|-----------------------------------------------------------------------------------------------------------------------------------------------|-------------------------|---------------------|
| (H <sub>7</sub> C <sub>3</sub> N <sub>6</sub> )·(H <sub>6</sub> C <sub>3</sub> N <sub>6</sub> )ZnCl <sub>3</sub>                              | 3.95 <sup>e</sup>       | 6.1363              |
| (C <sub>3</sub> N <sub>6</sub> H <sub>6</sub> ) <sub>2</sub> (C <sub>3</sub> N <sub>6</sub> H <sub>7</sub> )PF <sub>6</sub> ·H <sub>2</sub> O | 4.20 <sup>e</sup>       | 6.2095              |
| (C <sub>3</sub> N <sub>6</sub> H <sub>7</sub> ) <sub>2</sub> SiF <sub>6</sub> ·H <sub>2</sub> O                                               | 4.76 <sup>e</sup>       | 6.1955              |
| <b>C<sub>3</sub>N<sub>6</sub>H<sub>7</sub>SO<sub>3</sub>NH<sub>2</sub></b>                                                                    | <b>5.53<sup>e</sup></b> | <b>6.2269</b>       |

Note: the upper corner labeled "e" for experimentally obtained.

**Figure S1.** SEM images and EDX microanalysis for  $C_3N_6H_7SO_3NH_2$ .

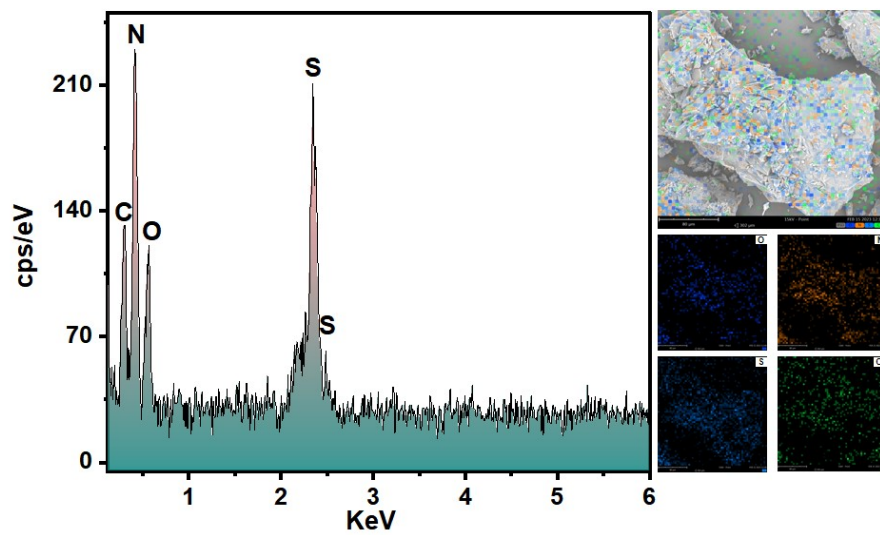

**Figure S2.** The IR spectrum for  $C_3N_6H_7SO_3NH_2$

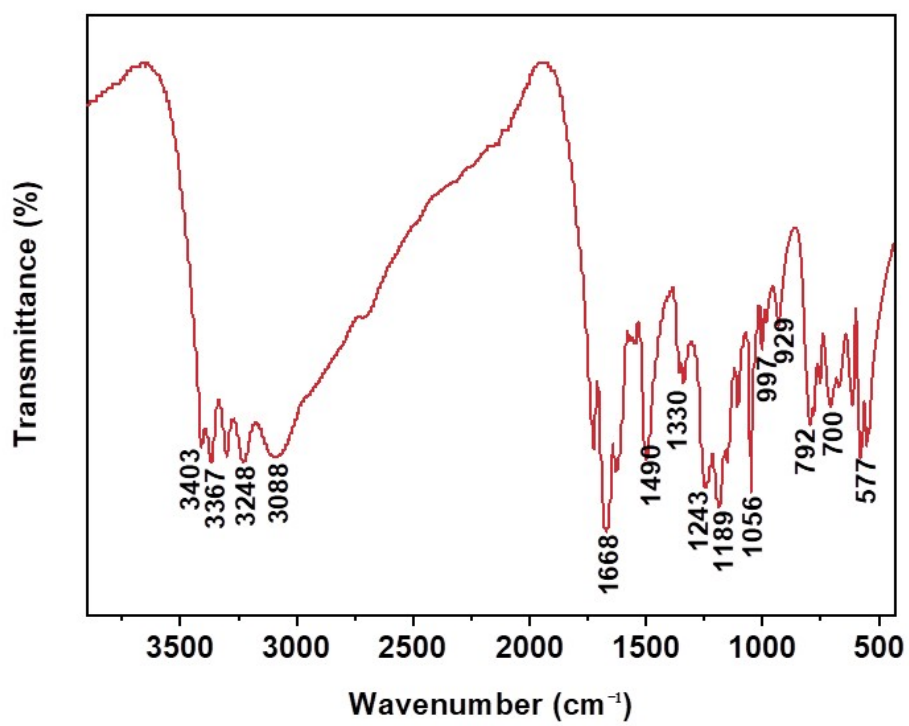



**Figure S3.** The UV-vis-NIR diffuse reflectance spectrum of  $C_3N_6H_6$ .

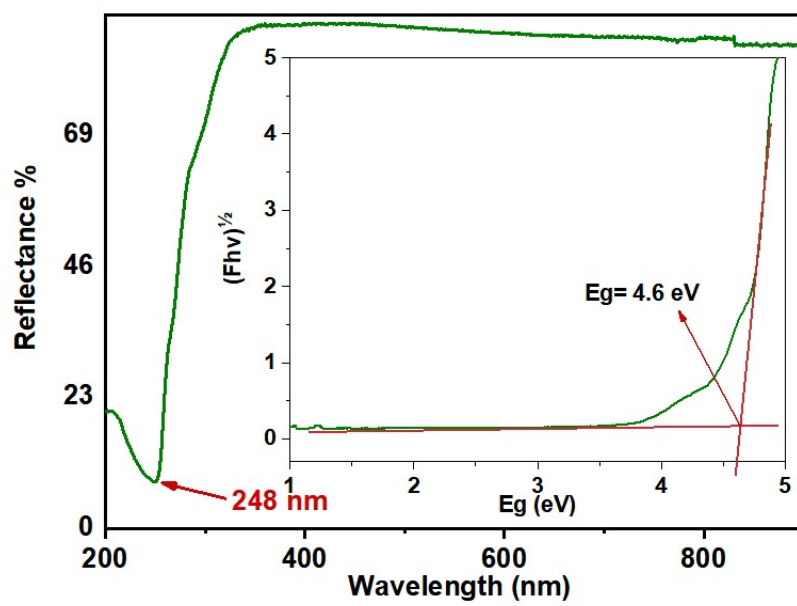

**Figure S4.** Crystal picture under polarizing microscope. (a) The original colour of crystal; (b) Crystal achieving complete extinction; (c) The thickness of crystal.

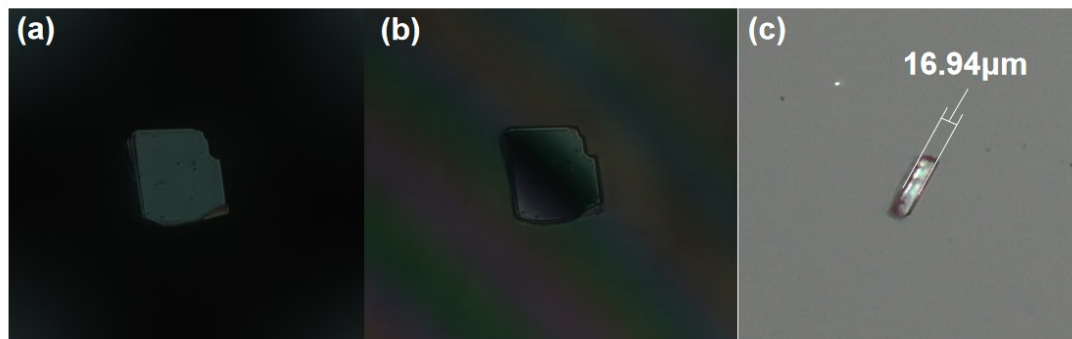

**Figure S5.** The calculated band gaps using GGA (a and b) and HSE06 functionals (c and d) for  $C_3N_6H_7SO_3NH_2$ .

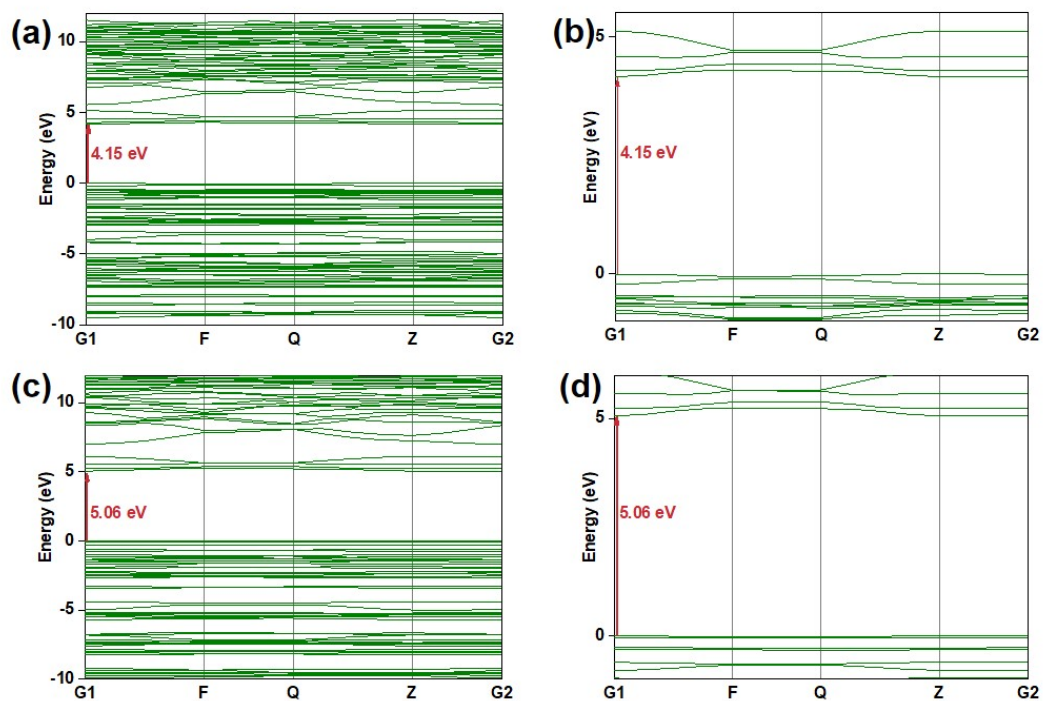

## Reference.

1. Z. Y. Bai, J. Lee, H. Kim, C. L. Hu and K. M. Ok, Unveiling the superior optical properties of novel melamine-based nonlinear optical material with strong second-harmonic generation and giant optical anisotropy, *Small*, 2023, e2301756.
2. Y. G. Shen, Y. W. Zhou, X. L. Xue, H. L. Yu, S. G. Zhao and J. H. Luo,  $(\text{C}_3\text{N}_6\text{H}_7)_2\text{SiF}_6\cdot\text{H}_2\text{O}$ : an ultraviolet birefringent crystal exceeding the intrinsic energy gap of an organic reagent, *Inorg. Chem. Front.*, 2022, **9**, 5226-5230.
3. L. H. Liu, F. F. Yuan, Y. S. Huang, Z. B. Lin and L. Z. Zhang, Two UV optical crystals with strong optical anisotropy, large band gaps and an alpha-BBO type structure, *Dalton. Trans.*, 2023, **52**, 5798-5803.
4. L. H. Liu, Z. Y. Bai, L. Hu, D. S. Wei, Z. B. Lin and L. Z. Zhang, A melamine-based organic-inorganic hybrid material revealing excellent optical performance and moderate thermal stability, *J. Mater. Chem. C*, 2021, **9**, 7452-7457.
5. L. H. Liu, C. L. Hu, Z. Y. Bai, F. F. Yuan, Y. S. Huang, L. Z. Zhang and Z. B. Lin,  $2(\text{C}_3\text{H}_7\text{N}_6)^+\cdot 2\text{Cl}^-\cdot\text{H}_2\text{O}$ : an ultraviolet nonlinear optical crystal with large birefringence and strong second-harmonic generation, *Chem. Commun.*, 2020, **56**, 14657-14660.
6. W. Q. Huang, X. Zhang, Y. Q. Li, Y. Zhou, X. Chen, X. Q. Li, F. F. Wu, M. C. Hong, J. H. Luo and S. G. Zhao, A hybrid halide perovskite birefringent crystal, *Angew. Chem. Int. Ed.*, 2022, **61**, e202202746.
7. W. Q. Huang, X. L. Wu, B. L. Ahmed, Y. Q. Li, Y. Zhou, H. Wang, Y. P. Song, X. J. Kuang, J. H. Luo and S. G. Zhao, A hybrid halide lead-free pseudo-perovskite with large birefringence, *Inorg. Chem. Front.*, 2023, **10**, 2039-2044.
8. Y. G. Shen, L. Ma, G. F. Dong, H. L. Yu and J. H. Luo,  $\beta\text{-(C}_3\text{H}_7\text{N}_6)_2\text{Cl}_2\cdot\text{H}_2\text{O}$  and  $(\text{C}_3\text{H}_7\text{N}_6)\text{F}\cdot\text{H}_2\text{O}$ : two UV birefringent crystals induced by uniformly aligned structural groups, *Inorg. Chem. Front.*, 2023, **10**, 2022-2029.
9. Y. G. Shen, B. Chen, H. Chen and J. H. Luo,  $(\text{C}_3\text{N}_6\text{H}_7)_2\text{SbF}_5\cdot\text{H}_2\text{O}$  Exhibiting strong optical anisotropy from the optimal arrangement of pi-conjugated  $(\text{C}_3\text{N}_6\text{H}_7)^+$  groups, *Inorg. Chem.*, 2022, **61**, 14242-14246.
10. C. C. Jin, F. M. Li, Z. H. Yang, S. L. Pan and M. Mutailipu,  $[\text{C}_3\text{N}_6\text{H}_7]_2[\text{B}_3\text{O}_3\text{F}_4(\text{OH})]$ : A new hybrid birefringent crystal with strong optical anisotropy induced by mixed functional units, *J. Mater. Chem. C*, 2022, **10**, 6590-6595.
11. S. F. Li, L. Hu, Y. Ma, F. F. Mao, J. Zheng, X. D. Zhang and D. Yan, Noncentrosymmetric  $(\text{C}_3\text{H}_7\text{N}_6)_6(\text{H}_2\text{PO}_4)_4(\text{HPO}_4)\cdot 4\text{H}_2\text{O}$  and Centrosymmetric  $(\text{C}_3\text{H}_7\text{N}_6)_2\text{SO}_4\cdot 2\text{H}_2\text{O}$ : Exploration of acentric structure by combining planar and tetrahedral motifs via hydrogen bonds, *Inorg. Chem.*, 2022, **61**, 10182-10189.
